# Supplementary material
Source: Springer Nature journal article supplement (https://www.springermedizin.de/resource/supplementary/12889_2011_3945_MOESM1_ESM.pdf/9492570)

WP1: Management of the Consortium (DE) \*

WP2: †

Description of Health Care  
Structures (SE)

WP3: ‡

Clinical Data Collection (NL)

WP5: ¶

Best Practice Strategies (ES + EE)

WP4: §

Economic Evaluation (DE)

WP6: Dissemination (DE) †

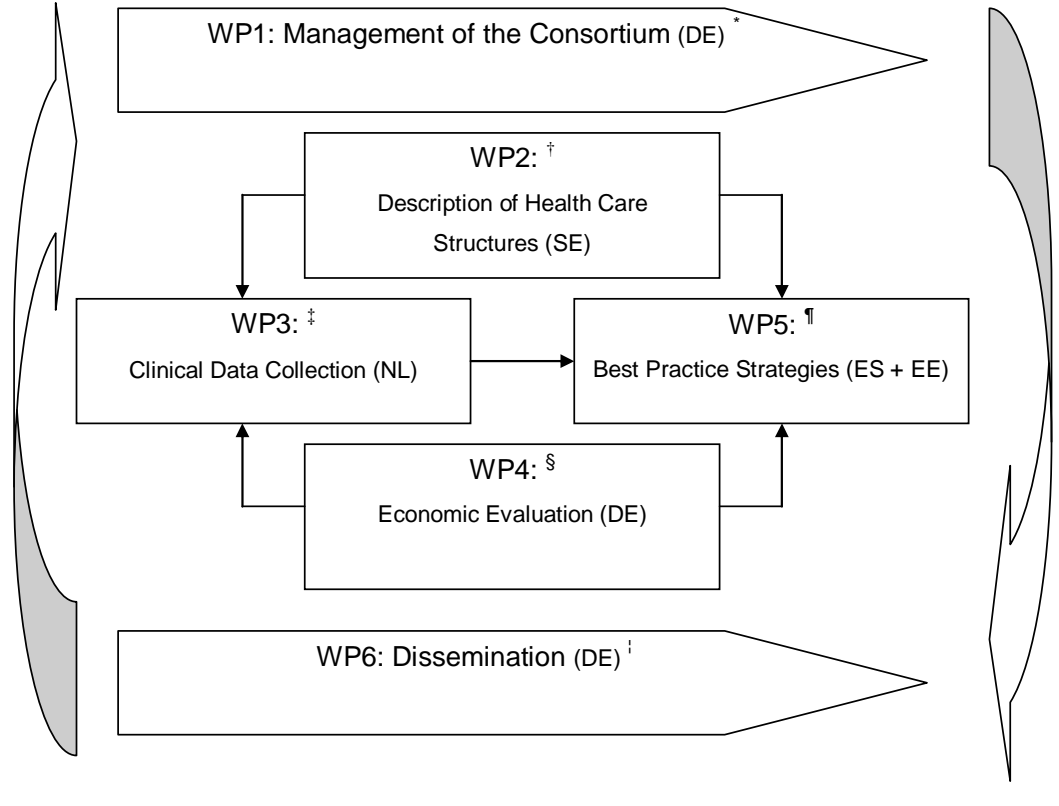

Supplement: MOESM1 [file 9492570]
